# Supplementary material
Source: PubMed Central journal article supplement (PMC10843389)
Supplement: NIHMS1955805-supplement-suppl_table_1.pdf [file NIHMS1955805-supplement-suppl_table_1.pdf]

**Supplementary Table 1: qRT-PCR primers used.**

| <b>Gene</b> | <b>Sense primer</b>     | <b>Antisense primer</b> | <b>Accession n<sup>o</sup></b> |
|-------------|-------------------------|-------------------------|--------------------------------|
| Actb        | CTGGGACGACATGGAGAAGA    | ACCAGAGGCATACAGGGACA    | NM_007393                      |
| Hprt        | CAGTCAACGGGGGACATAAA    | AGAGGTCTTTTCACCAGCAA    | NM_013556                      |
| Ppia        | TGGTCTTTGGGAAGGTGAAAG   | TGTCCACAGTCGGAATGGT     | NM_008907                      |
| Ghr         | TCTGGAAAGCCTCGATTAC     | TCAGGGCATTCTTTCCATT     | NM_001286370                   |
| Gh          | CCTCAGCAGGATTTTCACCA    | CTTGAGGATCTGCCAACAC     | NM_008117.3                    |
| Igf1        | TCGTCTTCACACCTCTTCTACCT | ACTCATCCACAATGCCTGTCT   | NM_010512                      |
| Igfals      | GCTCAGCGTCTTTTGCAGTT    | AGGGGATGGAGGACAGGTT     | NM_008340                      |
| Igfbp1      | ATTAGCTGCAGCCCAACAGA    | GAGTCCAGCTTCTCCATCCA    | NM_008341.4                    |
| Socs2       | CAGCTGTCTGGGACGTGTT     | TTCCCCAGTACCATCCTGTTT   | NM_007706.4                    |
| Ghsr        | TCAGGGACCAGAACCACAAA    | CCAGCAGAGGATGAAAGCAA    | NM_177330.4                    |
| Ghrhr       | ACCCGTATCCTCTGCTTGCT    | AGGTGTTGTTGGTCCCCTCT    | NM_001003685.3                 |
| Gck         | AAACTACCCCTGGGCTTTCAC   | ATTGCCACCACATCCATCTC    | NM_010292                      |
| Khk         | GCAGCCTCATGGAAGAGAAG    | AAGGACAGTGCAGGAGTTGG    | NM_001310524.1                 |
| Pck1        | TGGGGTGTTTGTAGGAGCAG    | CCAGGTATTTGCCGAAGTTG    | NM_011044.3                    |
| G6pc        | TCGAGGAAAGAAAAGCCAAC    | CAATGCCTGACAAGACTCCA    | NM_008061.4                    |
| Pklr        | AGGAGTCTTCCCCTTGCTCTAC  | GGAGAGGCGTTTCAGGATATG   | NM_013631                      |
| Tkfc        | ATGAGTTCCAAGAAGATGGTGAA | AAACACAGATCCTGCGATGAC   | NM_145496.1                    |
| Pdk4        | GACCCCGTTACCAATCAAAA    | TTTGCACACTCAAAGGCATC    | NM_013743.2                    |
| Acaca       | ATCCTGCGAACCTGGATTCT    | CCCACCAGAGAAACCTCTCC    | NM_133360.2                    |
| Acacb       | GCAGTATACGGTGGAGGACG    | TTGATGTACTTCACCCGGCC    | NM_133904.2                    |
| Fasn        | TGAGCACACTGCTGGTGAAC    | CAGGTTTCGGAATGCTATCCA   | NM_007988.3                    |
| Scd1        | ATCGCCCCTACGACAAGAAC    | GTTGATGTGCCAGCGGTA      | NM_009127.4                    |
| Elovl6      | TCCAATGGATGCAGGAAAAC    | AAGAGTCAGCGACCAGAGCA    | NM_130450.2                    |
| Srebf1      | GGAGCCATGGATTGCACATT    | GGCCAGGGAAGTCACTGT      | NM_001276708.1                 |
| Cd36        | GGAGCCATCTTTGAGCCTTC    | TGGATCTTTGTAACCCCAACAAG | NM_001159555.1                 |
| Bcl6        | GGACTCTACCATCCCCCAAG    | GAGGCACATCTCTGTATGCTGT  | NM_009744.4                    |

**Supplementary Table 2:** Antibodies used for Western Blot.

| <b>Antibody</b>                 | <b>Reference</b> | <b>Company</b>           | <b>Dilution</b> |
|---------------------------------|------------------|--------------------------|-----------------|
| GHR                             | AL47             | provided by Dr. SJ Frank | 1:2000          |
| GCK                             | ab88056          | Abcam                    | 1:1000          |
| KHK                             | ab197593         | Abcam                    | 1:1000          |
| CHREBP                          | NB400-135        | Novus Biologicals        | 1:500           |
| SREBP1                          | MABS1987         | Sigma-Aldrich            | 1:500           |
| CD36                            | ab133625         | Abcam                    | 1:1000          |
| GAPDH                           | 5174S            | Cell Signaling           | 1:1000          |
| LAMIN A/C                       | 2032S            | Cell Signaling           | 1:1000          |
| AKT                             | 9272S            | Cell Signaling           | 1:1000          |
| p-AKT (S473)                    | 9271S            | Cell Signaling           | 1:1000          |
| FOXO1                           | ab52857          | Abcam                    | 1:1000          |
| Goat Anti-Rabbit IgG HRP-linked | 7074S            | Cell Signaling           | 1:2000          |

**Supplementary Table 3: Endpoints measured in male and female control and aHepGHRkd mice with or without rIGF1 or STAT5b<sup>CA</sup> replacement.** Exp 1: food was removed at 0600h, male and female mice were injected with deuterated water at 1200h and sacrificed at 1600h. Exp 2: male mice were fasted overnight (from 1700h to 0900h for 16h) and after that, half of the mice were sacrificed at 0900h and the other half were refed for 6h. Values represent mean  $\pm$  SEM Values that do not share a common letter (a, b, c) are statistically different ( $p < 0.05$ ). NEFA: non-esterified fatty acid; TG: triglycerides; 3-HB: 3-hydroxybutyrate; (F): fasting; (R) refed.

| Experiment 1: post-absorptive state |                                  |                                |                                  |                                  |                                  |                                |                                  |                                  |
|-------------------------------------|----------------------------------|--------------------------------|----------------------------------|----------------------------------|----------------------------------|--------------------------------|----------------------------------|----------------------------------|
|                                     | MALES                            |                                |                                  |                                  | FEMALES                          |                                |                                  |                                  |
|                                     | Ctrl                             | Kd                             | Kd+rIGF1                         | Kd+STAT5b <sup>CA</sup>          | Ctrl                             | Kd                             | Kd+rIGF1                         | Kd+STAT5b <sup>CA</sup>          |
| Glucose (mg/dL)                     | 178 $\pm$ 12.33                  | 178.9 $\pm$ 10.77              | 168.3 $\pm$ 9.003                | 180.6 $\pm$ 7.165                | 134.6 $\pm$ 7.269                | 166.9 $\pm$ 14.67              | 138.2 $\pm$ 10.41                | 139 $\pm$ 15.44                  |
| NEFA (mEq/L)                        | 1.015 $\pm$ 0.082                | 1.142 $\pm$ 0.076              | 1.219 $\pm$ 0.049                | 1.182 $\pm$ 0.089                | 0.601 $\pm$ 0.038                | 0.699 $\pm$ 0.051              | 0.548 $\pm$ 0.050                | 0.585 $\pm$ 0.075                |
| TG (mg/dL)                          | 18.76 $\pm$ 3.724                | 21.01 $\pm$ 2.492              | 20.01 $\pm$ 2.231                | 18.99 $\pm$ 2.586                | 9.93 $\pm$ 1.42                  | 11.84 $\pm$ 1.90               | 9.16 $\pm$ 2.22                  | 13.08 $\pm$ 1.29                 |
| 3-HB ( $\mu$ M)                     | 221.6 $\pm$ 25.98 <sup>a</sup>   | 98.19 $\pm$ 21.87 <sup>b</sup> | 181.6 $\pm$ 35.86 <sup>a,b</sup> | 177.2 $\pm$ 25.37 <sup>a,b</sup> | 76.75 $\pm$ 11.97                | 55.26 $\pm$ 14.97              | 77.63 $\pm$ 21.92                | 44.41 $\pm$ 9.92                 |
| Insulin ( $\mu$ g/L)                | 0.414 $\pm$ 0.108 <sup>a,c</sup> | 1.282 $\pm$ 0.151 <sup>b</sup> | 0.287 $\pm$ 0.06 <sup>a</sup>    | 0.749 $\pm$ 0.11 <sup>c</sup>    | 0.403 $\pm$ 0.05 <sup>a</sup>    | 0.778 $\pm$ 0.13 <sup>b</sup>  | 0.488 $\pm$ 0.06 <sup>a</sup>    | 0.57 $\pm$ 0.09 <sup>a</sup>     |
| GH (ng/ml)                          | 0.831 $\pm$ 0.344 <sup>a</sup>   | 15.04 $\pm$ 3.394 <sup>b</sup> | 1.891 $\pm$ 0.515 <sup>a</sup>   | 2.015 $\pm$ 0.468 <sup>a</sup>   | 3.592 $\pm$ 0.936 <sup>a,b</sup> | 6.64 $\pm$ 0.944 <sup>b</sup>  | 3.484 $\pm$ 0.726 <sup>a,b</sup> | 3.242 $\pm$ 0.664 <sup>a</sup>   |
| IGF1 (ng/ml)                        | 420.7 $\pm$ 26.34 <sup>a</sup>   | 42.04 $\pm$ 0.29 <sup>b</sup>  | 378.9 $\pm$ 12.44 <sup>a,c</sup> | 267 $\pm$ 20.59 <sup>b,c</sup>   | 435.5 $\pm$ 13.47 <sup>a</sup>   | 98.30 $\pm$ 19.57 <sup>b</sup> | 386.1 $\pm$ 39.32 <sup>a</sup>   | 311.5 $\pm$ 23.76 <sup>a,b</sup> |

| Experiment 2: overnight fast and refeeding 6h |                                |                               |                                |                                |                                |                                 |                                 |                                 |
|-----------------------------------------------|--------------------------------|-------------------------------|--------------------------------|--------------------------------|--------------------------------|---------------------------------|---------------------------------|---------------------------------|
|                                               | Overnight fast                 |                               |                                |                                | Refed                          |                                 |                                 |                                 |
|                                               | Ctrl                           | Kd                            | Kd+rIGF1                       | Kd+STAT5b <sup>CA</sup>        | Ctrl                           | Kd                              | Kd+rIGF1                        | Kd+STAT5b <sup>CA</sup>         |
| Food intake (g)                               | -                              | -                             | -                              | -                              | 1.774 $\pm$ 0.07               | 1.608 $\pm$ 0.09                | 1.954 $\pm$ 0.07                | 1.944 $\pm$ 0.11                |
| Glucose (mg/dL)                               | 82.57 $\pm$ 2.77               | 97.14 $\pm$ 6.34              | 92.57 $\pm$ 6.83               | 83.88 $\pm$ 2.60               | 158.3 $\pm$ 6.18 <sup>a</sup>  | 136.6 $\pm$ 4.42 <sup>a,b</sup> | 129.1 $\pm$ 6.49 <sup>b,c</sup> | 145.9 $\pm$ 8.09 <sup>a,c</sup> |
| NEFA (mEq/L)                                  | 1.41 $\pm$ 0.103               | 1.67 $\pm$ 0.24               | 1.65 $\pm$ 0.33                | 1.58 $\pm$ 0.099               | 0.23 $\pm$ 0.05 <sup>a</sup>   | 0.52 $\pm$ 0.04 <sup>b</sup>    | 0.42 $\pm$ 0.08 <sup>a,b</sup>  | 0.34 $\pm$ 0.06 <sup>a,b</sup>  |
| TG (mg/dL)                                    | 106.9 $\pm$ 9.52               | 131.6 $\pm$ 14.52             | 85.71 $\pm$ 11.08              | 93.27 $\pm$ 8.79               | 81.68 $\pm$ 7.11 <sup>a</sup>  | 180.6 $\pm$ 27.53 <sup>b</sup>  | 131.6 $\pm$ 18.51 <sup>a</sup>  | 110.7 $\pm$ 18.47 <sup>a</sup>  |
| 3-HB ( $\mu$ M)                               | 1019 $\pm$ 68.42               | 898.7 $\pm$ 101.4             | 931.6 $\pm$ 54.45              | 927.2 $\pm$ 97.6               | 51.13 $\pm$ 4.39               | 66.17 $\pm$ 8.26                | 68.17 $\pm$ 8.06                | 59.65 $\pm$ 6.43                |
| Insulin ( $\mu$ g/L)                          | 0.144 $\pm$ 0.05               | 0.395 $\pm$ 0.16              | 0.11 $\pm$ 0.03                | 0.236 $\pm$ 0.06               | 3.285 $\pm$ 0.38               | 3.448 $\pm$ 0.62                | 2.569 $\pm$ 0.56                | 3.808 $\pm$ 0.63                |
| GH (ng/ml)                                    | 3.15 $\pm$ 1.15                | 24.53 $\pm$ 7.69              | 0.92 $\pm$ 0.54                | 1.51 $\pm$ 0.32                | 14.30 $\pm$ 4.74               | 34.03 $\pm$ 11.77               | 10.19 $\pm$ 5.35                | 9.16 $\pm$ 2.33                 |
| IGF1 (ng/ml)                                  | 448.4 $\pm$ 58.07 <sup>a</sup> | 17.52 $\pm$ 4.87 <sup>b</sup> | 560.9 $\pm$ 55.33 <sup>a</sup> | 356.1 $\pm$ 60.91 <sup>a</sup> | 464.2 $\pm$ 72.98 <sup>a</sup> | 33.04 $\pm$ 6.38 <sup>b</sup>   | 391.1 $\pm$ 69.7 <sup>a</sup>   | 415.5 $\pm$ 41.75 <sup>a</sup>  |
